# Supplementary material for: Revealing the remarkable structural diversity of the alkali metal transfer agents of the trans-calix[2]benzene[2]pyrrolide ligand
Source: Royal Society of Chemistry journal article supplement (doi:10.1039/c6cc07240b), 2016-01-01
Supplement: c6cc07240b1.pdf [file c6cc07240b1.pdf]

## Supporting Information

### Revealing the remarkable structural diversity of the alkali metal transfer agents of the *trans*-calix[2]benzene[2]pyrrolidide ligand

M. Ángeles Fuentes, Antonio J. Martínez-Martínez, Alan R. Kennedy and Robert E. Mulvey\*

*WestCHEM, Department of Pure and Applied Chemistry, University of Strathclyde, Glasgow, G1 1XL (UK), E-mail: [r.e.mulvey@strath.ac.uk](mailto:r.e.mulvey@strath.ac.uk)*

## Contents

|                                           |    |
|-------------------------------------------|----|
| <b>EXPERIMENTAL SECTION</b>               | 5  |
| General Procedures.....                   | 5  |
| Crystal Structure Determinations.....     | 5  |
| Synthesis of complexes <b>1 – 6</b> ..... | 13 |

**Note for brevity that compound 6 does not appear in the paper proper.**

|                    |    |
|--------------------|----|
| <b>NMR SPECTRA</b> | 17 |
| <b>REFERENCES</b>  | 26 |

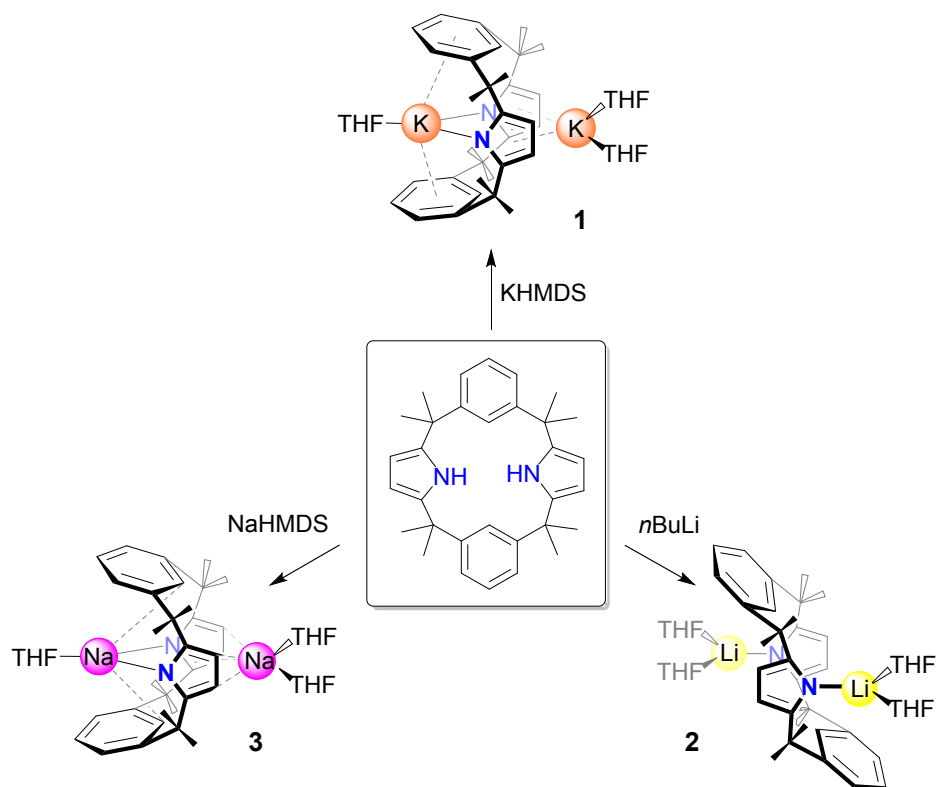

**Scheme S1.** Reaction scheme for discrete dinuclear monomers.

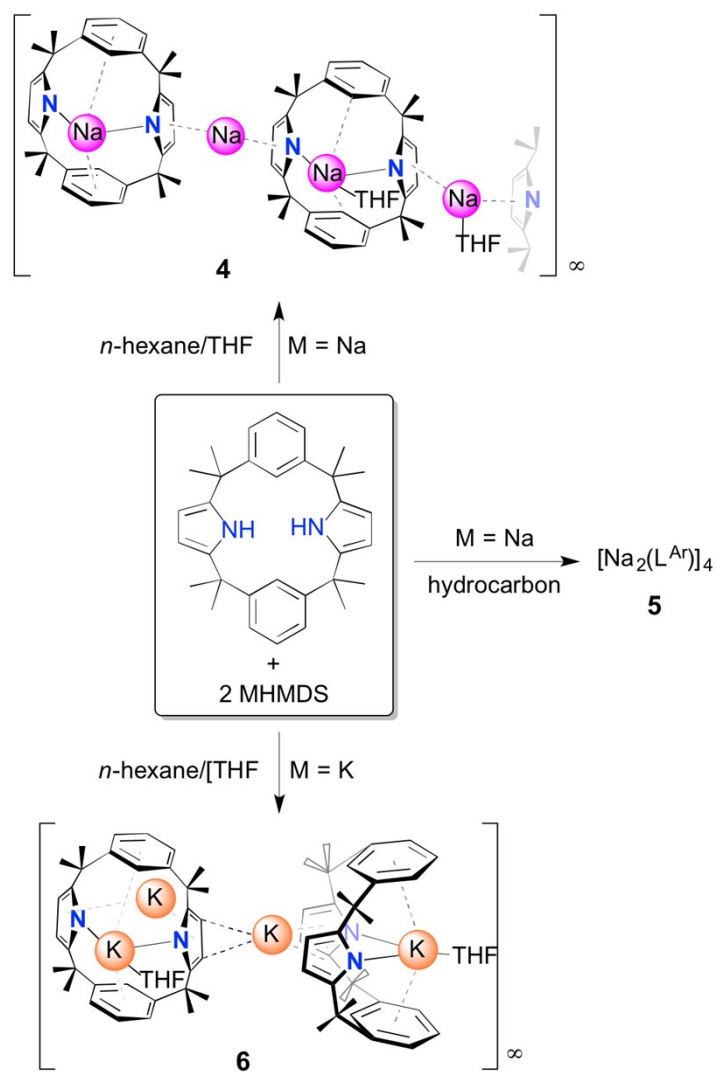

**Scheme S2.** Reaction scheme for polymers and tetramer.

## EXPERIMENTAL SECTION

**General Procedures.** All reactions and manipulations were performed under a protective atmosphere of dry pure argon gas using standard Schlenk tube or glovebox techniques. Solvents were dried by heating to reflux over sodium benzophenone ketyl and distilled under nitrogen prior to use. Methylcyclohexane was distilled over sodium metal and stored with activated molecular sieves (4 Å) prior to use. Deuterated NMR solvents were degasified and stored over molecular sieves (4 Å) prior to use. *n*BuLi (1.6 M in *n*-hexane) solution was purchased from Aldrich and titrated prior to use. Sodium bis(trimethylsilyl)amide (NaHMDS) and potassium bis(trimethylsilyl)amide (KHMDS) were purchased from Aldrich and used as received. *trans*-Calix[2]benzene[2]pyrrole, H<sub>2</sub>L<sup>Ar</sup>, was prepared according to literature procedures.<sup>[1]</sup> NMR spectra were recorded on a Bruker DPX 400 NMR spectrometer, operating at 400.1 MHz for <sup>1</sup>H, 155.5 MHz for <sup>7</sup>Li and 100.6 MHz for <sup>13</sup>C. <sup>1</sup>H and <sup>13</sup>C{<sup>1</sup>H} spectra were referenced to the appropriate residual solvent signal, <sup>7</sup>Li NMR spectra were referenced against LiCl in D<sub>2</sub>O ( $\delta$  = 0.00 ppm). Elemental analyses of the compounds **1** – **6** were carried out using a Perkin Elmer 2400 elemental analyser.

**Crystal Structure Determinations.** Single-crystal data were measured at 123(2) K on Oxford Diffraction Diffractometers with Cu-*K* $\alpha$  radiation ( $\lambda$  = 1.5418 Å) for **1**, **2**, **4**, **5** and **6**. Measurements were at 170(2) K with Cu-*K* $\alpha$  radiation ( $\lambda$  = 1.5418 Å) for **3**. The structures were refined to convergence on  $F^2$  and against all independent reflections by full-matrix least-squares using SHELXL programs.<sup>[2]</sup> All non-hydrogen atoms were refined anisotropically and hydrogen atoms were geometrically placed and allowed to ride on their parent atoms. For **5**, the equivalent of 419 electrons were removed from approx 2600 Å<sup>3</sup> of “void” space per unit cell using the program SQUEEZE.<sup>[3]</sup> This electron density was believed to be due to disordered and partially present solvent molecules. Two CH(CH<sub>3</sub>)<sub>2</sub> units of **5** were modelled as disordered over two sites as were tetrahydrofuran ligands of **1**, **3**, **4** and **6**. The geometries and displacement parameters of these groups were restrained to approximate typical values. In **4** the disorder of the thf ligands is associated with disordered positions for two of the four crystallographically independent Na sites. Caution is thus needed

when interpreting the geometric details of Na1 and Na4. CCDC-1499377 (**1**), CCDC-1499378 (**2**), CCDC-1499379 (**3**), CCDC-1499380 (**4**), CCDC-1499381 (**5**) and CCDC-1499382 (**6**) contain the supplementary crystallographic data for this paper. These data can be obtained free of charge from the Cambridge Crystallographic Data Centre via [www.ccdc.cam.ac.uk/data\\_request/cif](http://www.ccdc.cam.ac.uk/data_request/cif).

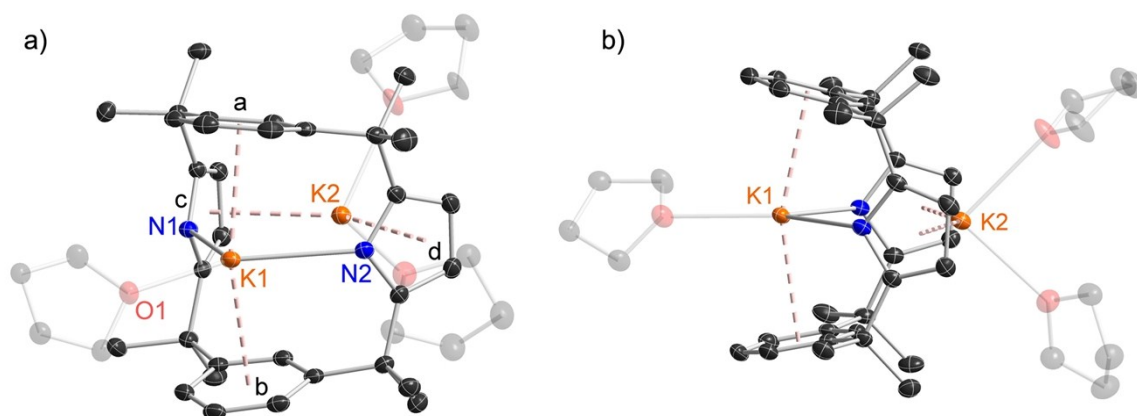

**Figure 1.** Molecular structure of  $[K_2(L^{Ar})(thf)_3]$ , **1**. Thermal ellipsoids are displayed at 35% probability, hydrogen atoms and one disordered component of two tetrahydrofuran ligands have been omitted for clarity. The dashed lines illustrate the  $K \cdots C$  interactions.  $C_6H_4$  and  $C_4H_2$  (pyrrolide) centroids are labelled as a – b and c – d, respectively. Selected bond lengths [Å] and angles [°]: K1-N1 2.8822(15); K1-N2 2.8815(14); K2-N1 3.3262(14) K2-N2 3.0667(15); K1-O1 2.8349(14); K1-a 2.9088; K1-b 2.8972; K2-c 2.9258; K2-d 2.8736; N2-K1-N1 102.00(4); a-K1-b 160.122; c-K2-d 144.563.

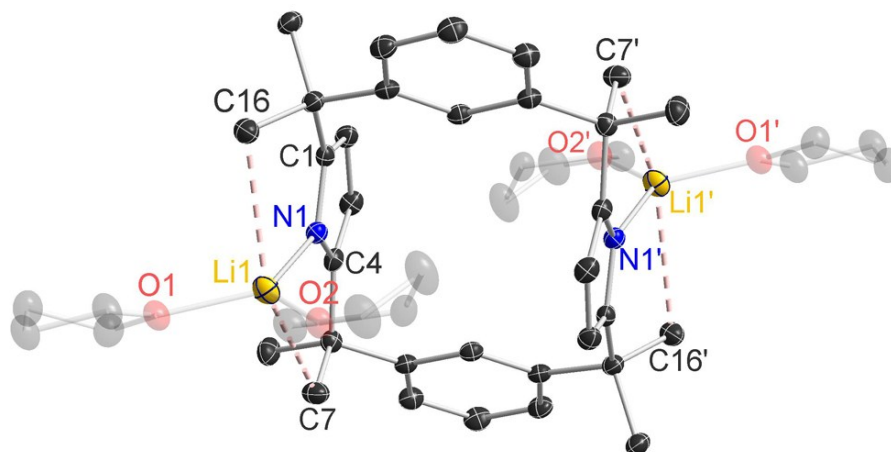

**Figure 2.** Molecular structure of  $[\text{Li}_2(\text{L}^{\text{Ar}})(\text{thf})_4]$ , **2**. Thermal ellipsoids are displayed at 35% probability and hydrogen atoms have been omitted for clarity. The dashed lines represent short  $\text{Li}\cdots\text{Me}$  contacts. The symmetry operation used to generate equivalent atoms denoted with ' is  $-x+2, -y+1, -z+1$ . Selected bond lengths [Å] and angles [°]: Li1-N1 1.940(3); Li1-O1 1.944(3); Li1-O2 1.899(3); Li1-C7 2.727(3); Li1-C16 2.815(3); Li1-N1-C4 125.76(13); Li1-N1-C1 127.05(13); N1-Li1-C7 73.81(10); N1-Li1-C16 72.887(94); N1-Li1-O1 128.69(16); N1-Li1-O2 122.32(16); O1-Li1-O2 108.61(14); O1-Li1-C7 102.78(12); O2-Li1-C7 102.14(13); O1-Li1-C16 94.57(12); O2-Li1-C16 99.15(12); C7-Li1-C16 146.419; C4-N1-C1 105.68(12).

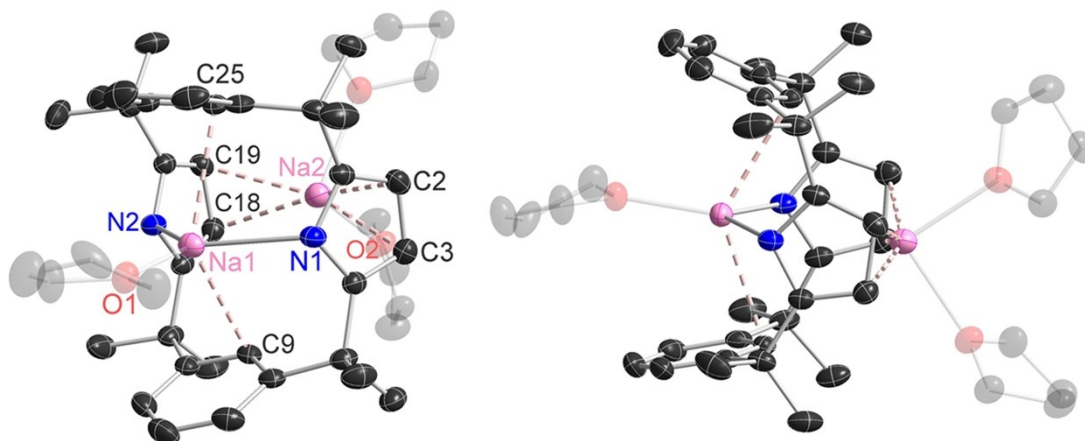

**Figure 3.** Molecular structure of  $[\text{Na}_2(\text{L}^{\text{Ar}})(\text{thf})_3]$ , **3**. Thermal ellipsoids are displayed at 35% probability, hydrogen atoms and one disordered component of each tetrahydrofuran ligands have been omitted for clarity. The dashed lines represent short  $\text{Na}\cdots\text{C}$  contacts. Selected bond lengths [Å] and angles [°]: Na1-O1 2.2467(14); Na1-N2 2.4867(16); Na1-N1 2.5006(16); Na1-C9 2.8254(17); Na1-C25 2.8509(16); Na2-O2 2.3547(15); Na2-C2 2.756(2); Na2-C18 2.8443(18); Na2-C19 2.8653(18); Na2-C3 2.8954(19); N2-Na1-N1 124.51(5); N2-Na1-C9 80.39(5); N1-Na1-C9 77.99(5); N2-Na1-C25 78.48(5); N1-Na1-C25 78.76(5); C9-Na1-C25 131.15(5); C2-Na2-C18 158.55(6); C2-Na2-C19 147.54(6); C18-Na2-C19 28.75(5); C2-Na2-C3 28.87(5); C18-Na2-C3 139.63(6); C19-Na2-C3 157.12(6).

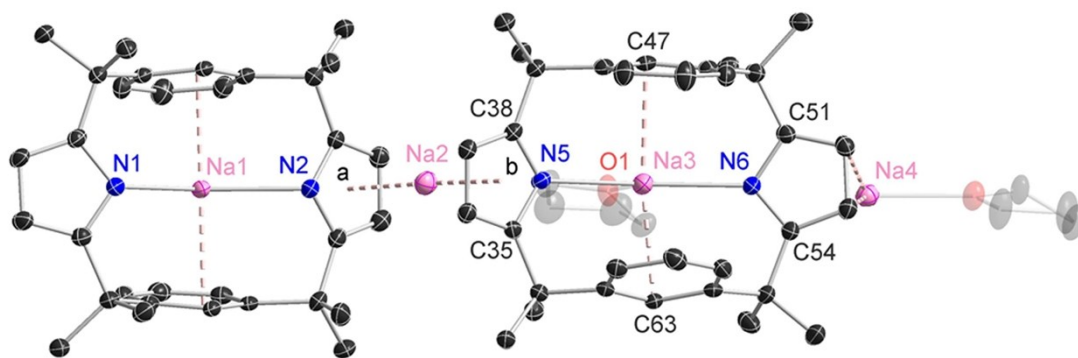

**Figure 4.** Molecular structure of  $[\{Na_2(L^{Ar})(thf)_2\}\{Na_2(L^{Ar})\}]_\infty$ , **4**, showing the contents of the asymmetric unit. Thermal ellipsoids are displayed at 35% probability. Hydrogen atoms, two disordered molecules of thf of crystallisation, and disordered components of a Na-thf moiety and a Na metal centre have been omitted for clarity. The disordered Na sites are Na1 and Na4. The dashed lines illustrate the Na $\cdots$ C interactions. a – b labels correspond to a centroid from C<sub>4</sub>H<sub>2</sub>N (pyrrolide). Selected bond lengths [Å] and angles [°]: Na2-N2 2.697(4); Na2-N5 2.716(4); Na2-a 2.3671 ; Na2-b 2.3582 ; Na3-O1 2.390(4); Na3-N5 2.435(3); Na3-N6 2.446(3); Na3-C47 2.718(4); Na3-C63 2.739(4); N2-Na2-N5 177.19(13); a-Na2-b 177.307; O1-Na3-N5 92.56(12); O1-Na3-N6 101.27(13); N5-Na3-N6 166.16(14); O1-Na3-C47 101.43(14); N5-Na3-C47 86.70(12); N6-Na3-C47 90.29(12); O1-Na3-C63 104.85(14); N5-Na3-C63 90.25(11); N6-Na3-C63 86.47(12); C47-Na3-C63 153.65(14); C35-N5-Na3 122.6(2); C38-N5-Na3 126.2(2); Na3-N5-Na2 138.96(14); C54-N6-Na3 126.3(3); C51-N6-Na3 122.5(3).



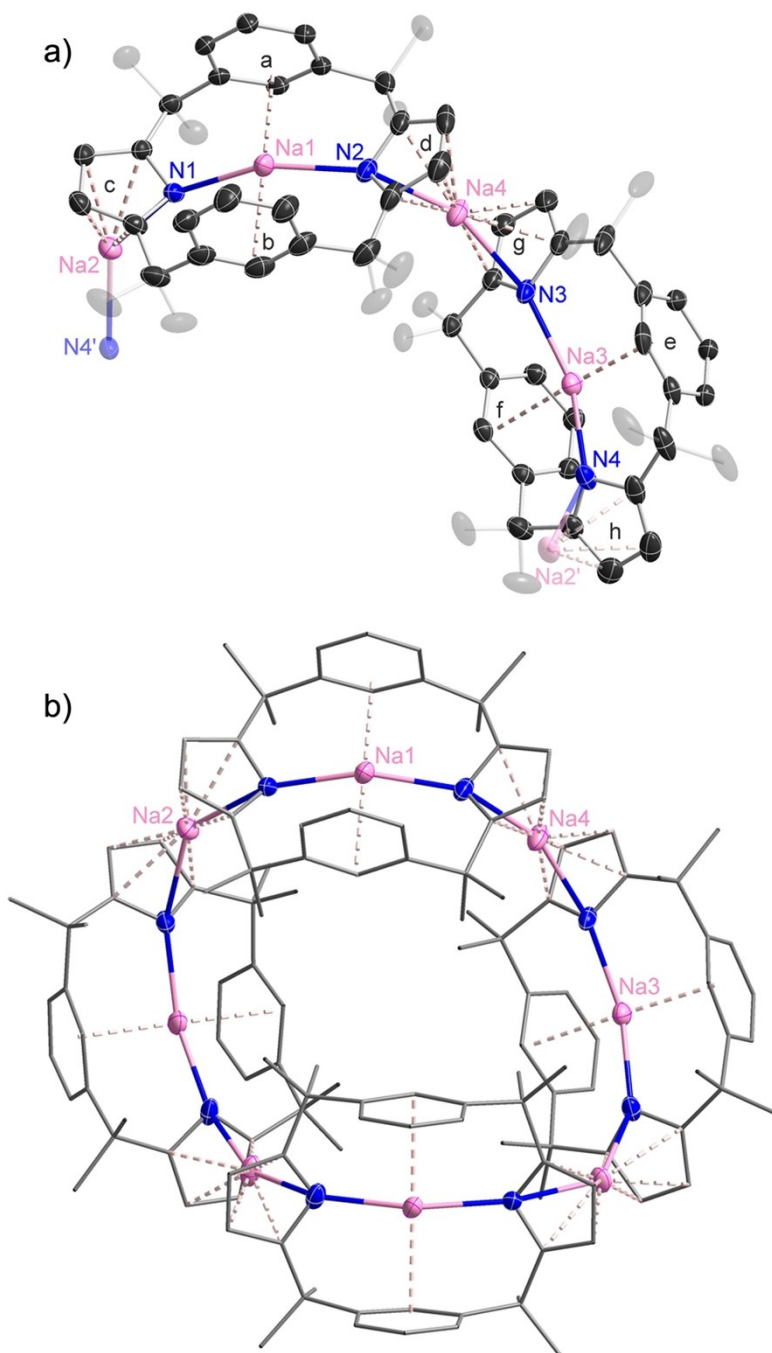

**Figure 5.** a) Molecular structure of  $[\text{Na}_2(\text{L}^{\text{Ar}})]_4$ , **5**, showing the contents of the asymmetric unit which corresponds to a quarter turn of the cyclic structure. b) Extended cyclic three dimensional structural framework of **5** showing atomic connectivity between the metal and the macrocyclic ligand. Thermal ellipsoids are displayed at 35% probability, hydrogen atoms and one disordered component of two  $\text{C}(\text{CH}_3)_2$  groups have been omitted for clarity. The dashed lines represent  $\text{Na}\cdots\text{C}$  contacts. The symmetry operation used to generate equivalent atoms denoted with ' is  $-x+1, y, -z+3/2$ . a – b, e – f labels correspond to centroids  $(\text{C}_q)_2\text{CH}$  whilst c – d, g – h labels correspond to a centroids  $\text{C}_4\text{H}_2$  (pyrrolide). Selected bond lengths [ $\text{\AA}$ ] and angles [ $^\circ$ ]: Na1-N1 2.4063(18); Na1-N2 2.4046(18); Na3-N3 2.3935(17); Na3-N4 2.4070(16); Na2-N1 2.6623(17); Na4-N2 2.6104(17); Na4-N3 2.5496(18); Na2'-N4 2.6559(17); Na1-a 2.710(2)-2.8577(19); Na1-b 2.7186(18)-2.8670(18); Na2-c 2.659(2)-2.710(2); Na3-e 2.707(2)-2.870(2); Na3-f 2.722(2)-2.968(2); Na4-d 2.601(2)-2.787(3); Na4-g 2.601(2)-2.841(3); Na2'-h 2.656(2)-2.713(2); N1-Na1-N2 153.23(7); N3-Na3-N4 151.90(7); Na1-N1-Na2' 145.29(8); Na1-N2-Na4 149.73(9); N4'-Na2-N1 139.29(6); Na3-N3-Na4 143.77(8); Na3-N4-Na2' 153.69(8); N3-Na4-N2 158.03(7), a-Na1-b 174.3; c-Na2-h' 164.0; e-Na3-f 178.4; d-Na4-g 154.1.

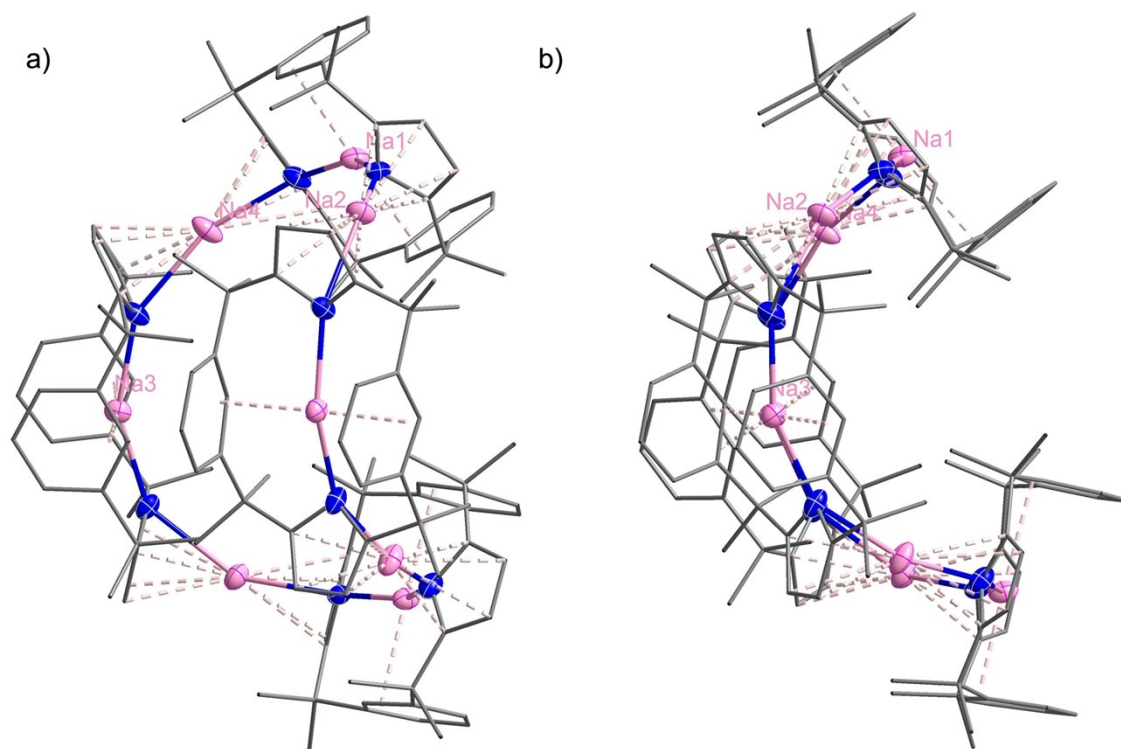

**Figure 6.** Side view of the core structure of  $[\text{Na}_2(\text{L}^{\text{Ar}})]_4$ , **5**. Thermal ellipsoids are displayed at 35% probability, hydrogen atoms have been omitted for clarity. C and N atoms are pictured as capped sticks. The dashed lines represent  $\text{Na}\cdots\text{C}$  contacts.

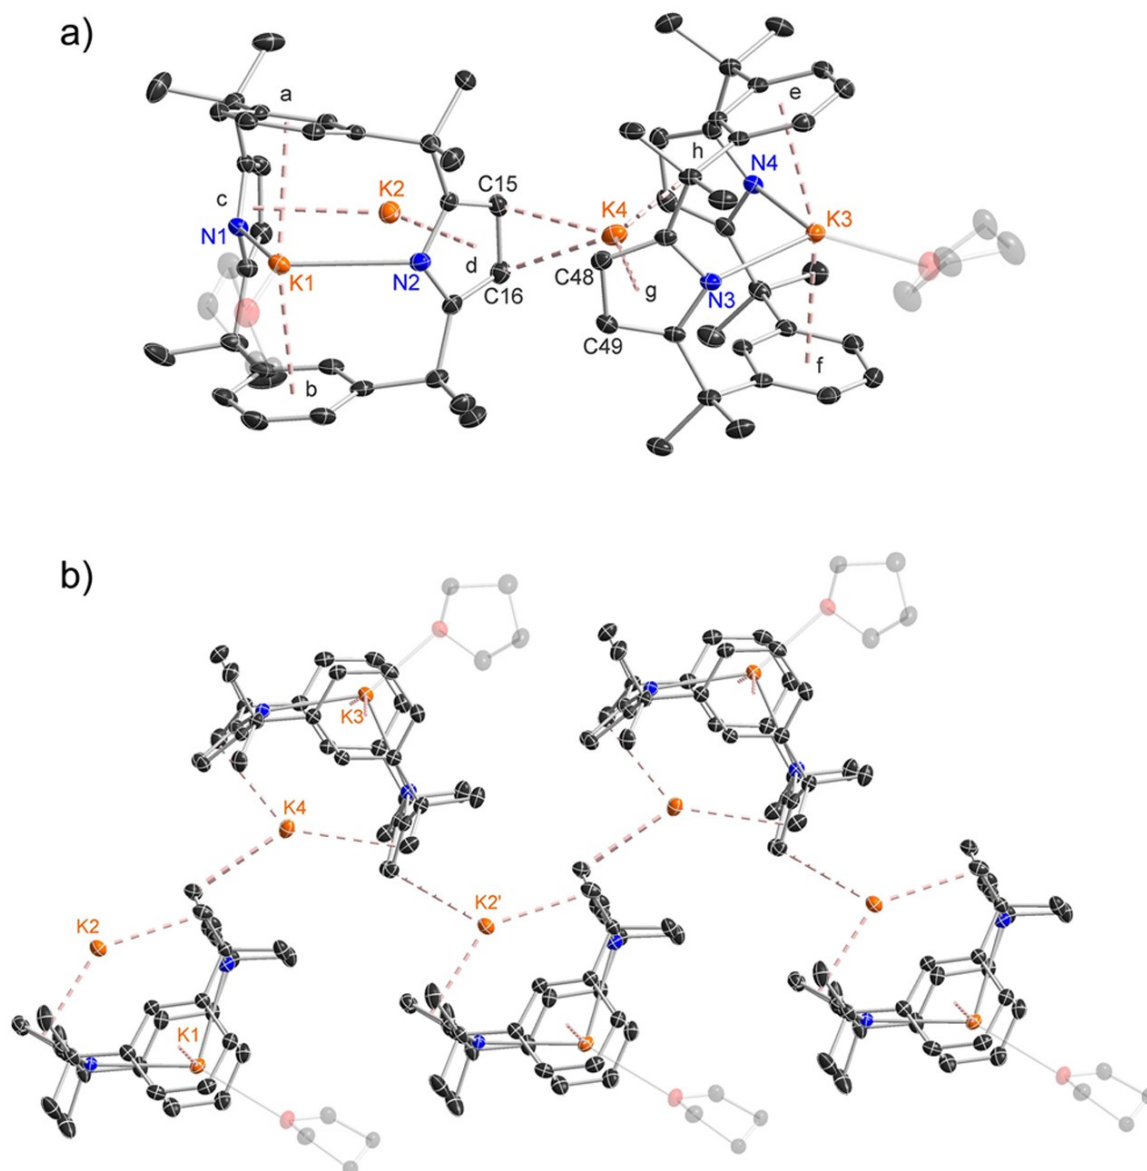

**Figure 7.** a) Molecular structure of  $[K_2(L^{Ar})(thf)]_\infty$ , **6**, showing the contents of the asymmetric unit. b) Section of the extended two dimensional structural framework showing the atomic connectivity between the metal and the macrocyclic ligand. Thermal ellipsoids are displayed at 35% probability, hydrogen atoms and one disordered component of tetrahydrofuran ligands have been omitted for clarity. The dashed lines illustrate the  $K \cdots C$  interactions. a – b, e – f labels correspond to a centroid from  $C_6H_4$  and c – d, g – h labels correspond to a centroid from  $C_4H_2$  (pyrrolide). The symmetry operation used to generate equivalent atoms denoted with ' is  $x+1,y,z$ . Selected bond lengths [Å] and angles [°]: K1-N1 2.8951(18); K1-N2 2.8503(18); K3-N3 2.8610(17); K3-N4 2.8187(18); K4-C15 3.046(2); K4-C16 3.309(2); K2'-C48 3.235(2); K2'-C49 3.089(2); K1-a 2.9161; K1-b 2.8715; K2-c 2.8490; K2-d 2.9886; K3-e 2.9325; K3-f 2.9175; K4-g 2.9674; K4-h 2.8759; N1-K1-N2 104.86(5); N3-K3-N4 105.24(5); C15-K2-C16 26.77(6); C15-K4-C16 25.34(5); C48-K2'-C49 25.91(5); C16-C15-K4 87.79(13); C15-C16-K4 66.87(12); a-K1-b 161.380; c-K2-d 140.055; e-K3-f 162.858; g-K4-h 137.746; C15-K4-g 138.213; C16-K4-g 130.261; C15-K4-h 83.837; C16-K4-h 88.851.

| <b>Table 1.</b> Selected crystallographic and refinement data for <b>1 – 3.</b> |                                                                              |                                                                               |                                                                               |
|---------------------------------------------------------------------------------|------------------------------------------------------------------------------|-------------------------------------------------------------------------------|-------------------------------------------------------------------------------|
|                                                                                 | <b>1</b>                                                                     | <b>2</b>                                                                      | <b>3</b>                                                                      |
| Formula                                                                         | C <sub>44</sub> H <sub>60</sub> K <sub>2</sub> N <sub>2</sub> O <sub>3</sub> | C <sub>48</sub> H <sub>68</sub> Li <sub>2</sub> N <sub>2</sub> O <sub>4</sub> | C <sub>44</sub> H <sub>60</sub> N <sub>2</sub> Na <sub>2</sub> O <sub>3</sub> |
| Fw                                                                              | 743.14                                                                       | 750.92                                                                        | 710.92                                                                        |
| Cryst. System                                                                   | Monoclinic                                                                   | Monoclinic                                                                    | Monoclinic                                                                    |
| Space Group                                                                     | P2 <sub>1</sub> /c                                                           | P 2 <sub>1</sub> /n                                                           | P 2 <sub>1</sub> /n                                                           |
| Wavelength/Å                                                                    | 1.54184                                                                      | 1.54184                                                                       | 1.54184                                                                       |
| a/Å                                                                             | 21.3422(2)                                                                   | 10.69220(10)                                                                  | 10.30734(17)                                                                  |
| b/Å                                                                             | 9.86590(10)                                                                  | 15.3289(2)                                                                    | 27.6447(4)                                                                    |
| c/Å                                                                             | 19.6135(2)                                                                   | 12.9982(2)                                                                    | 14.8943(3)                                                                    |
| α/°                                                                             | 90                                                                           | 90                                                                            | 90                                                                            |
| β/°                                                                             | 103.0860(10)                                                                 | 90.0580(10)                                                                   | 105.5875(17)                                                                  |
| γ/°                                                                             | 90                                                                           | 90                                                                            | 90                                                                            |
| Volume/Å <sup>3</sup>                                                           | 4022.57(7)                                                                   | 2130.40(5)                                                                    | 4087.94(12)                                                                   |
| Z                                                                               | 4                                                                            | 2                                                                             | 4                                                                             |
| Temp./K                                                                         | 123(2)                                                                       | 123(2)                                                                        | 170(2)                                                                        |
| Refls. Collect.                                                                 | 27454                                                                        | 27244                                                                         | 28493                                                                         |
| 2θ <sub>max</sub>                                                               | 139.98                                                                       | 139.99                                                                        | 146.09                                                                        |
| R <sub>int</sub>                                                                | 0.0297                                                                       | 0.0536                                                                        | 0.0265                                                                        |
| Goodness of fit                                                                 | 1.023                                                                        | 1.029                                                                         | 1.061                                                                         |
| R[F <sup>2</sup> >2σ], F                                                        | 0.0429                                                                       | 0.0522                                                                        | 0.0506                                                                        |
| R <sub>w</sub> (all data), F <sup>2</sup>                                       | 0.1171                                                                       | 0.1456                                                                        | 0.1448                                                                        |

| <b>Table 2.</b> Selected crystallographic and refinement data for <b>4 – 6.</b> |                                                                                |                                                                  |                                                                              |
|---------------------------------------------------------------------------------|--------------------------------------------------------------------------------|------------------------------------------------------------------|------------------------------------------------------------------------------|
|                                                                                 | <b>4</b>                                                                       | <b>5</b>                                                         | <b>6</b>                                                                     |
| Formula                                                                         | C <sub>80</sub> H <sub>104</sub> N <sub>4</sub> Na <sub>4</sub> O <sub>4</sub> | C <sub>128</sub> H <sub>144</sub> N <sub>8</sub> Na <sub>8</sub> | C <sub>72</sub> H <sub>88</sub> K <sub>4</sub> N <sub>4</sub> O <sub>2</sub> |
| Fw                                                                              | 1277.63                                                                        | 1978.42                                                          | 1197.86                                                                      |
| Cryst. System                                                                   | Monoclinic                                                                     | Orthorhombic                                                     | Triclinic                                                                    |
| Space Group                                                                     | C c                                                                            | Pbcn                                                             | P -1                                                                         |
| Wavelength/Å                                                                    | 1.54184                                                                        | 1.54184                                                          | 1.54184                                                                      |
| a/Å                                                                             | 10.2275(2)                                                                     | 19.8237(3)                                                       | 10.4694(2)                                                                   |
| b/Å                                                                             | 35.0736(6)                                                                     | 19.6671(3)                                                       | 16.0165(4)                                                                   |
| c/Å                                                                             | 19.9910(3)                                                                     | 32.4878(3)                                                       | 20.7659(6)                                                                   |
| α/°                                                                             | 90                                                                             | 90                                                               | 109.148(3)                                                                   |
| β/°                                                                             | 90.7580(10)                                                                    | 90                                                               | 102.765(2)                                                                   |
| γ/°                                                                             | 90                                                                             | 90                                                               | 92.213(2)                                                                    |
| Volume/Å <sup>3</sup>                                                           | 7170.4(2)                                                                      | 12666.2(3)                                                       | 3184.73(15)                                                                  |
| Z                                                                               | 4                                                                              | 4                                                                | 2                                                                            |
| Temp./K                                                                         | 123(2)                                                                         | 123(2)                                                           | 123(2)                                                                       |
| Refls. Collect.                                                                 | 17946                                                                          | 69945                                                            | 32341                                                                        |
| 2θ <sub>max</sub>                                                               | 139.99                                                                         | 139.99                                                           | 139.98                                                                       |
| R <sub>int</sub>                                                                | 0.0228                                                                         | 0.0271                                                           | 0.0457                                                                       |
| Goodness of fit                                                                 | 1.041                                                                          | 1.035                                                            | 1.009                                                                        |
| R[F <sup>2</sup> >2σ], F                                                        | 0.0546                                                                         | 0.0526                                                           | 0.0439                                                                       |
| R <sub>w</sub> (all data), F <sup>2</sup>                                       | 0.1556                                                                         | 0.1484                                                           | 0.1221                                                                       |

## Synthesis of complexes 1 – 6

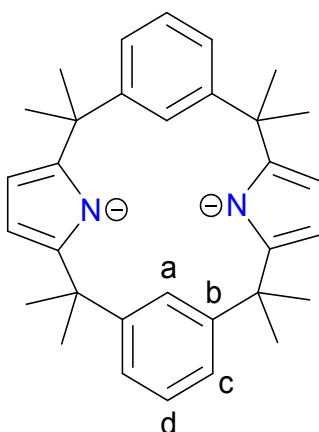

### Synthesis of $[K_2(L^{Ar})(thf)_3]$ , **1**

Potassium bis(trimethylsilyl)amide (279.2 mg, 1.4 mmol) was added via solid addition tube to a solution of  $H_2L^{Ar}$  (315.4 mg, 0.7 mmol) in tetrahydrofuran (10 mL) under argon atmosphere at room temperature. The resulting solution was stirred for 3 h at room temperature and then it was filtered. The resulting colourless solution was concentrated under vacuum (2 mL). Suitable crystals of **1** for an X-ray diffraction study were obtained at  $-26^\circ C$ . The crystalline material was filtered, washed with *n*-hexane (2 x 3 mL) and dried under vacuum for 20 min (115 mg, 0.15 mmol, 22%).  $^1H$  NMR (400.13 MHz,  $[D_8]thf$ ,  $25^\circ C$ ):  $\delta$  7.16 – 7.12 (m, 4H; *c*-CH), 7.09 – 7.05 (m, 2H; *d*-CH), 6.69 (br t,  $J(H,H)=1.7$  Hz, 2H; *a*-CH), 5.73 (s, 4H; CH-pyrrolide), 3.61 (m;  $OCH_2$ -thf), 1.77 (m;  $CH_2$ -thf), 1.42 ppm (s, 24H;  $CH_3$ ).  $^{13}C\{^1H\}$  NMR (100.6 MHz,  $[D_8]thf$ ,  $25^\circ C$ ):  $\delta$  154.5 (*b*- $C_q$ ), 152.6 ( $C_q$ -pyrrolide), 129.5 (*a*-CH), 127.0 (*d*-CH), 122.0 (*c*-CH-Ar), 98.2 (CH-pyrrolide), 67.2 ( $OCH_2$ -thf), 41.7 ( $C_q$ - $(CH_3)_2$ ), 31.2 ( $CH_3$ ), 25.1 ppm ( $CH_2$ -thf). We can observe by NMR spectroscopy that a small amount of thf was removed under vacuum. Present within the  $[D_8]thf$  solution is also a small amount of  $H_2L^{Ar}$  which is presumably a result of unavoidable hydrolysis. Elemental analysis calcd. (%) for  $C_{35}H_{42}K_2N_2O_{0.75}$   $[K_2(L^{Ar})(thf)_{0.75}]$ : C 72.36, H 7.29, N 4.82; found: C 71.65, H 7.29, N 5.28.

### Synthesis of $[Li_2(L^{Ar})(thf)_4]$ , **2**

Commercial *n*-butyllithium (0.87 mL, 1.6M solution in *n*-hexane, 1.4 mmol) was added via syringe to a Schlenk tube containing a suspension of  $H_2L^{Ar}$  (315.4 mg, 0.7 mmol) in *n*-hexane (10 mL) under argon atmosphere at room temperature. The

resulting suspension was stirred for 3 h at room temperature and then the solvent was removed under vacuum to give a white solid. Crystals suitable for X-ray analysis were obtained by slow diffusion of *n*-hexane (10 mL) into a tetrahydrofuran (5 mL) solution of **2**. The crystals were collected, washed with *n*-hexane (2 x 3 mL) and dried under vacuum for 20 min (410 mg, 0.55 mmol, 78%). <sup>1</sup>H NMR (400.13 MHz, C<sub>6</sub>D<sub>6</sub>/[D<sub>8</sub>]thf, 25°C): δ 7.94 (br s, 2H; *a*-CH), 7.14 (m, overlapping with C<sub>6</sub>D<sub>6</sub>, 4H; *c*-CH), 7.01 (t, *J*(H,H)=7.7 Hz, 2H; *d*-CH), 6.08 (s, 4H; CH-pyrrolide), 3.50 (m, 12H; OCH<sub>2</sub>-thf), 1.69 (s, 24H; CH<sub>3</sub>), 1.48 ppm (m, 12H; CH<sub>2</sub>-thf). <sup>13</sup>C{<sup>1</sup>H} NMR (100.6 MHz, C<sub>6</sub>D<sub>6</sub>/[D<sub>8</sub>]thf, 25°C): δ 152.3 (*b*-C<sub>q</sub>), 148.4 (C<sub>q</sub>-pyrrolide), 128.0 (overlapping with C<sub>6</sub>D<sub>6</sub>, *d*-CH), 125.4 (br, *a*-CH), 122.1 (*c*-CH), 101.4 (CH-pyrrolide), 67.0 (OCH<sub>2</sub>-thf), 41.2 (C<sub>q</sub>-(CH<sub>3</sub>)<sub>2</sub>), 32.0 (CH<sub>3</sub>), 24.8 ppm (CH<sub>2</sub>-thf). <sup>7</sup>Li NMR (155.5 MHz, C<sub>6</sub>D<sub>6</sub>/[D<sub>8</sub>]thf, 25°C): δ 4.67 ppm. Elemental analyses in combination with NMR spectroscopy reveal that the thf is partially removed under vacuum (*c.a.* 19%). Elemental analysis calcd. (%) for C<sub>45</sub>H<sub>62</sub>Li<sub>2</sub>N<sub>2</sub>O<sub>3.25</sub> [Li<sub>2</sub>(L<sup>Ar</sup>)(thf)<sub>3.25</sub>]: C 77.56, H 8.97, N 4.02; found: C 77.01, H 9.24, N 3.85.

### Synthesis of [Na<sub>2</sub>(L<sup>Ar</sup>)(thf)<sub>3</sub>], **3**

Sodium bis(trimethylsilyl)amide (256.7 mg, 1.4 mmol) was added via solid addition tube to a solution of H<sub>2</sub>L<sup>Ar</sup> (315.4 mg, 0.7 mmol) in tetrahydrofuran (10 mL) under argon atmosphere at room temperature. The resulting solution was stirred for 3 h at room temperature and it was filtered. The resulting colourless solution was concentrated under vacuum (2 mL) and **3** was crystallised as colourless crystals suitable for an X-ray diffraction study at -26°C for 48 h. **3** was filtered, washed with *n*-hexane (2 x 3 mL), and dried under vacuum for 20 min (175 mg, 0.24 mmol, 35%). <sup>1</sup>H NMR (400.13 MHz, [D<sub>8</sub>]thf, 25°C): δ 7.10 – 7.08 (m, 4H; *c*+*d*-CH), 7.05 – 7.01 (m, 2H; *c*+*d*-CH), 6.88 (br t, *J*(H,H)=1.7 Hz, 2H; *a*-CH), 5.79 (s, 4H; CH-pyrrolide), 3.61 (m; OCH<sub>2</sub>-thf), 1.77 (m; CH<sub>2</sub>-thf), 1.42 ppm (s, 24H; CH<sub>3</sub>). <sup>13</sup>C{<sup>1</sup>H} NMR (100.6 MHz, [D<sub>8</sub>]thf, 25°C): δ 153.3 (*b*-C<sub>q</sub>), 152.9 (C<sub>q</sub>-pyrrolide), 128.0 (*d*-CH), 127.3 (*a*-CH), 121.8 (*c*-CH), 97.4 (CH-pyrrolide), 68.02 (OCH<sub>2</sub>-thf), 41.7 (C<sub>q</sub>-(CH<sub>3</sub>)<sub>2</sub>), 31.0 (CH<sub>3</sub>), 26.1 (CH<sub>2</sub>-thf) ppm. Elemental analyses in combination with NMR spectroscopy reveal the thf is partially removed under vacuum (*c.a.* 50%). Elemental analysis calcd. (%) for C<sub>38</sub>H<sub>48</sub>N<sub>2</sub>Na<sub>2</sub>O<sub>1.5</sub> [Na<sub>2</sub>(L<sup>Ar</sup>)(thf)<sub>1.5</sub>]: C 75.72, H 8.03, N 4.65; found: C 75.30, H 8.30, N 4.66.

### Synthesis of $[\{\text{Na}_2(\text{L}^{\text{Ar}})(\text{thf})_2\}\{\text{Na}_2(\text{L}^{\text{Ar}})\}]_{\infty}$ , **4**

Sodium bis(trimethylsilyl)amide (256.7 mg, 1.4 mmol) was added via solid addition tube to a solution of  $\text{H}_2\text{L}^{\text{Ar}}$  (315.4 mg, 0.7 mmol) in tetrahydrofuran (10 mL) under argon atmosphere at room temperature. The resulting solution was stirred for 3 h at room temperature and then it was filtered. The resulting colourless solution was concentrated under vacuum (4 mL) and crystals suitable for X-ray analysis were obtained by slow diffusion of *n*-hexane (10 mL) into the tetrahydrofuran solution of **4**. The crystals were filtered, washed with *n*-hexane (2 x 3 mL), and dried under vacuum for 20 min (85 mg, 0.15 mmol, 21%).  $^1\text{H}$  NMR (400.13 MHz,  $\text{C}_6\text{D}_6/[\text{D}_8]\text{thf}$ , 25°C):  $\delta$  7.18 (dd,  $J(\text{H,H})=7.7$  Hz, 1.8 Hz, 4H; *c*-CH), 7.03 (t,  $J(\text{H,H})=7.7$  Hz, 1H; *d*-CH), 7.00 (t,  $J(\text{H,H})=7.7$  Hz, 1H; *d*-CH), 6.93 (br s, 2H; *a*-CH), 6.01 (s, 4H; CH-pyrrolide), 3.53 (m;  $\text{OCH}_2\text{-thf}$ ), 1.58 (s, 24H;  $\text{CH}_3$ ), 1.49 ppm (m;  $\text{CH}_2\text{-thf}$ ).  $^{13}\text{C}\{^1\text{H}\}$  NMR (100.6 MHz,  $\text{C}_6\text{D}_6/[\text{D}_8]\text{thf}$ , 25°C):  $\delta$  153.5 ( $\text{C}_q\text{-pyrrolide}$ ), 153.2 (*b*- $\text{C}_q$ ), 127.9 (overlapping with  $\text{C}_6\text{D}_6$ , *d*-CH), 127.4 (*a*-CH), 121.4 (*c*-CH), 97.3 (CH-pyrrolide), 67.0 ( $\text{OCH}_2\text{-thf}$ ), 41.7 ( $\text{C}_q\text{-(CH}_3)_2$ ), 31.0 ( $\text{CH}_3$ ), 24.8 ppm ( $\text{CH}_2\text{-thf}$ ). Elemental analyses in combination with NMR spectroscopy reveal that 3 molecules of thf are present within the isolated compound **4** which is in agreement with the presence of several molecules of thf of crystallisation within the crystal lattice of **4**. This solvent is only partially removed under vacuum. Present within the  $\text{C}_6\text{D}_6/[\text{D}_8]\text{thf}$  solution are residual resonances for  $\text{H}_2\text{L}^{\text{Ar}}$  which is the result of unavoidable hydrolysis. Elemental analysis calcd. (%) for  $\text{C}_{38}\text{H}_{48}\text{N}_2\text{Na}_2\text{O}_{1.5} [\{\text{Na}_2(\text{L}^{\text{Ar}})(\text{thf})_{1.5}\}\{\text{Na}_2(\text{L}^{\text{Ar}})\}]_{\infty}$ : C 75.72, H 8.03, N 4.65; found: C 75.70, H 8.48, N 4.67.

### Synthesis of $[\text{Na}_2(\text{L}^{\text{Ar}})]_4$ , **5**

Sodium bis(trimethylsilyl)amide (256.7 mg, 1.4 mmol) was added via solid addition tube to a diluted solution of  $\text{H}_2\text{L}^{\text{Ar}}$  (315.4 mg, 0.7 mmol) in methylcyclohexane (65 mL) under argon atmosphere. The reaction mixture was stirred for 6 h at room temperature. The reaction mixture was filtered to give a colourless solution which was concentrated under vacuum (c.a. 35 mL). Suitable crystals of **5** for an X-ray diffraction study were obtained at 4°C for 48 h. **5** was filtered, washed with *n*-hexane (2 x 3 mL) and dried under vacuum for 20 min (130 mg, 0.065 mmol, 38%). Alternatively, **5** can be crystallised by slow diffusion of *n*-hexane into the methylcyclohexane solution of **5** at room temperature.  $^1\text{H}$  NMR (400.13 MHz,

$C_6D_6/[D_8]thf$ , 25°C):  $\delta$  7.15 (dd,  $J(H,H)=7.6$  Hz, 1.8 Hz, 4H; *c-CH*), 6.99 (t,  $J(H,H)=7.7$  Hz, 2H; *d-CH*), 6.90 (br t, 2H; *a-CH*), 5.97 (s, 4H; *CH*-pyrrolide), 1.54 ppm (s, 24H;  $CH_3$ ).  $^{13}C\{^1H\}$  NMR (100.6 MHz,  $C_6D_6/[D_8]thf$ , 25°C):  $\delta$  153.4 ( $C_q$ -pyrrolide), 153.2 (*b-C<sub>q</sub>*), 127.9 (overlapping with  $C_6D_6$ , *d-CH*), 127.6 (*a-CH*), 121.4 (*c-CH*), 97.3 (*CH*-pyrrolide), 41.7 ( $C_q-(CH_3)_2$ ), 31.0 ppm ( $CH_3$ ). Present within the  $C_6D_6/[D_8]thf$  solution are residual resonances for  $H_2L^{Ar}$  which is the result of unavoidable hydrolysis, and for methylcyclohexane of crystallisation. Elemental analysis calcd. (%) for  $C_{32}H_{36}N_2Na_2$ : C 77.70, H 7.34, N 5.66; found: C 77.49, H 7.46, N 5.70.

### Synthesis of $[K_2(L^{Ar})(thf)]_{\infty}$ , **6**

Potassium bis(trimethylsilyl)amide (279.2 mg, 1.4 mmol) was added via solid addition tube to a solution of  $H_2L^{Ar}$  (315.4 mg, 0.7 mmol) in tetrahydrofuran (10 mL) under argon atmosphere at room temperature. The resulting solution was stirred for 3 h at room temperature and then it was filtered. The solution was concentrated under vacuum (3 mL) and crystals suitable for X-ray analysis were obtained by slow diffusion of *n*-hexane (10 mL) into the tetrahydrofuran solution of **6**. The crystals were collected, washed with *n*-hexane (2 x 3 mL) and dried under vacuum (220 mg, 0.37 mmol, 53%).  $^1H$  NMR (400.13 MHz,  $C_6D_6/[D_8]thf$ , 25°C):  $\delta$  7.21 (dd,  $J(H,H)=7.7$  Hz, 1.8 Hz, 4H; *c-CH*), 6.98 (t,  $J(H,H)=7.7$  Hz, 2H; *d-CH*), 6.86 (br t,  $J(H,H)=1.8$  Hz, 2H; *a-CH*), 6.07 (s, 4H; *CH*-pyrrolide), 3.54 (m;  $OCH_2$ -thf), 1.66 (s, 24H;  $CH_3$ ), 1.47 ppm (m;  $CH_2$ -thf).  $^{13}C\{^1H\}$  NMR (100.6 MHz,  $C_6D_6/[D_8]thf$ , 25°C):  $\delta$  154.6 (*b-C<sub>q</sub>*), 152.9 ( $C_q$ -pyrrolide), 129.3 (*a-CH*), 127.0 (*d-CH*), 121.9 (*c-CH*), 98.5 (*CH*-pyrrolide), 67.0 ( $OCH_2$ -thf), 41.7 ( $C_q-(CH_3)_2$ ), 31.2 ( $CH_3$ ), 24.7 ppm ( $CH_2$ -thf). Elemental analysis calcd. (%) for  $C_{36}H_{44}K_2N_2O$ : C 72.19, H 7.40, N 4.68; found: C 72.14, H 7.70, N 4.74.



## NMR SPECTRA

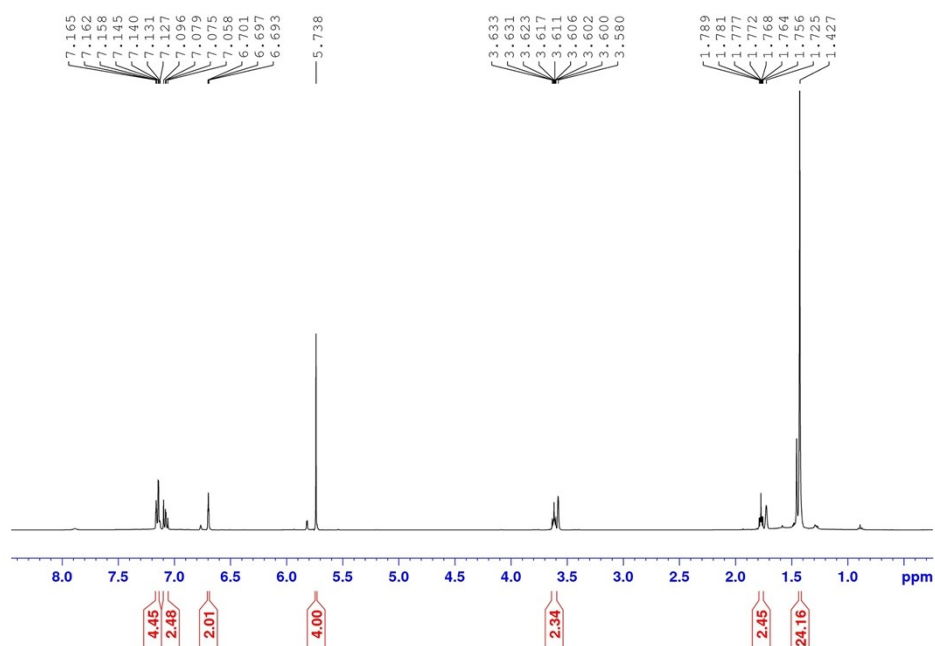

**Figure 8.**  $^1\text{H}$  NMR spectrum of  $[\text{K}_2(\text{L}^{\text{Ar}})(\text{thf})_3]$ , **1** (400.13 MHz,  $[\text{D}_8]\text{thf}$ ,  $25^\circ\text{C}$ ).

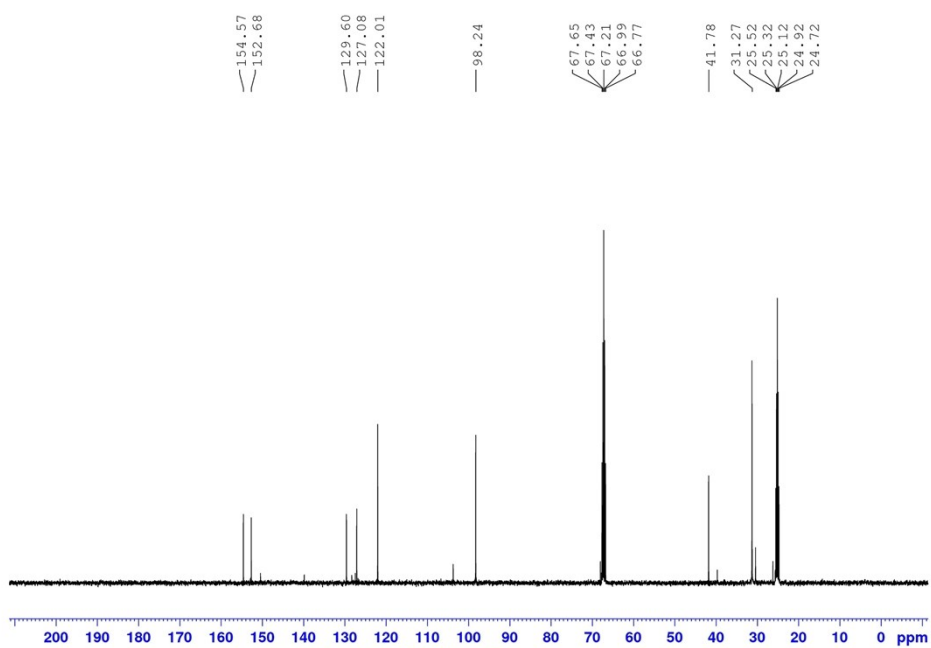

**Figure 9.**  $^{13}\text{C}\{^1\text{H}\}$  NMR spectrum of  $[\text{K}_2(\text{L}^{\text{Ar}})(\text{thf})_3]$ , **1** (100.6 MHz,  $[\text{D}_8]\text{thf}$ ,  $25^\circ\text{C}$ ).

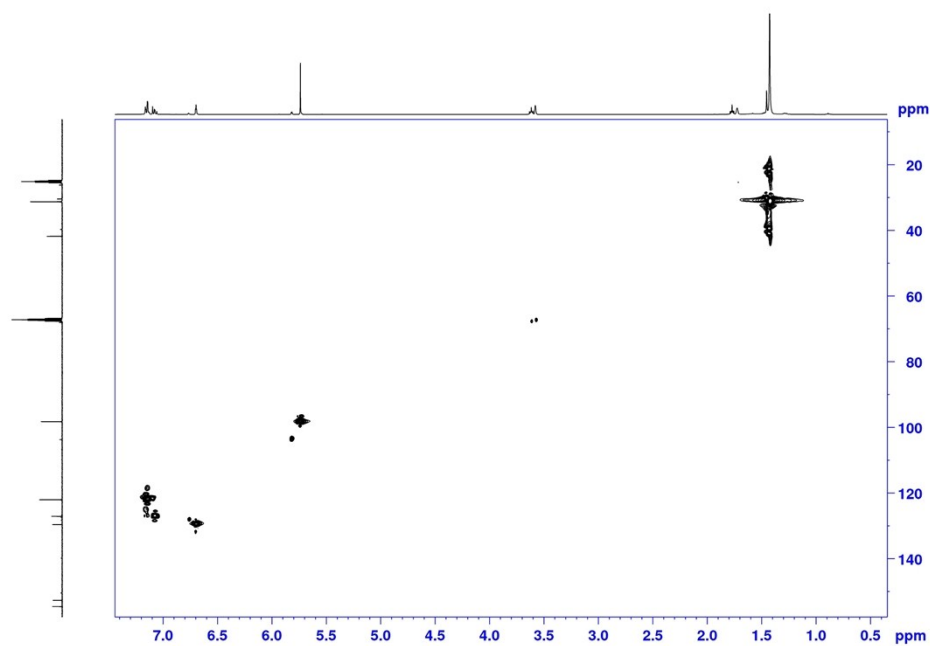

**Figure 10.**  $^1\text{H}$ ,  $^{13}\text{C}$ -HSQC NMR spectrum of  $[\text{K}_2(\text{L}^{\text{Ar}})(\text{thf})_3]$ , **1** (400.13 MHz,  $[\text{D}_8]\text{thf}$ ,  $25^\circ\text{C}$ ).

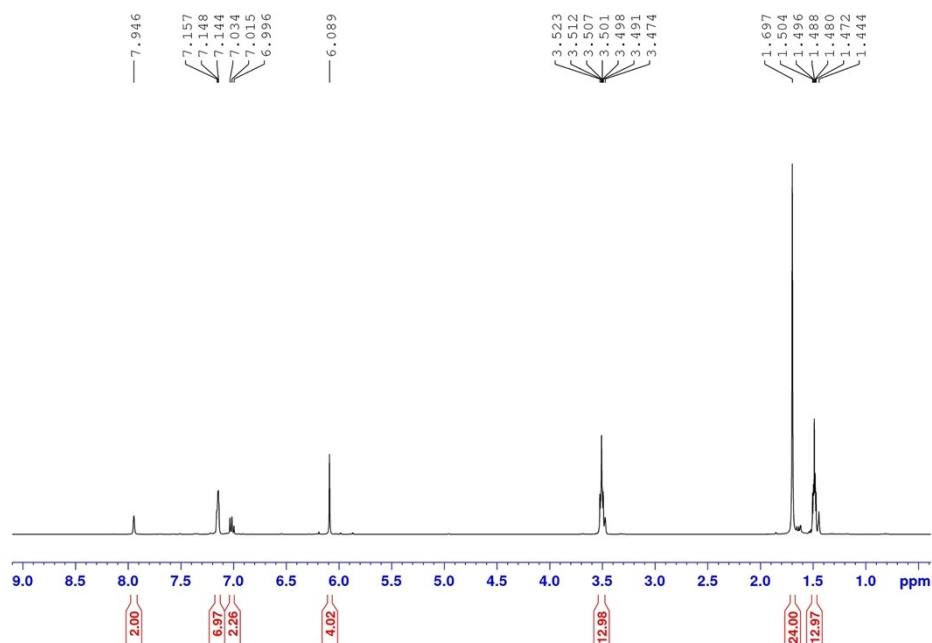

**Figure 11.**  $^1\text{H}$  NMR spectrum of  $[\text{Li}_2(\text{L}^{\text{Ar}})(\text{thf})_4]$ , **2** (400.13 MHz,  $\text{C}_6\text{D}_6/[\text{D}_8]\text{thf}$ ,  $25^\circ\text{C}$ ).

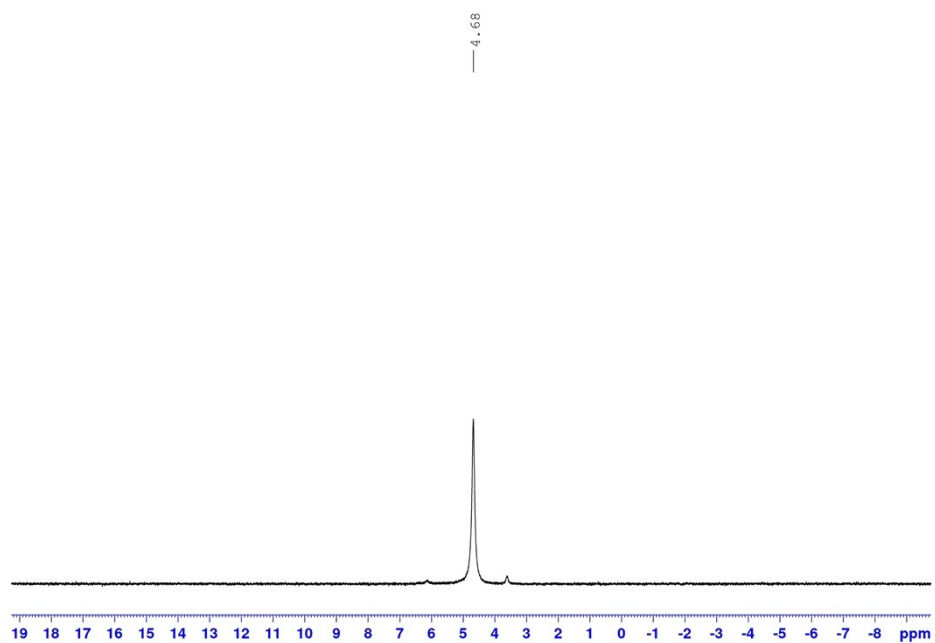

**Figure 12.**  ${}^7\text{Li}$  NMR spectrum of  $[\text{Li}_2(\text{L}^{\text{Ar}})(\text{thf})_4]$ , **2** (155.5 MHz,  $\text{C}_6\text{D}_6/[\text{D}_8]\text{thf}$ , 25°C).

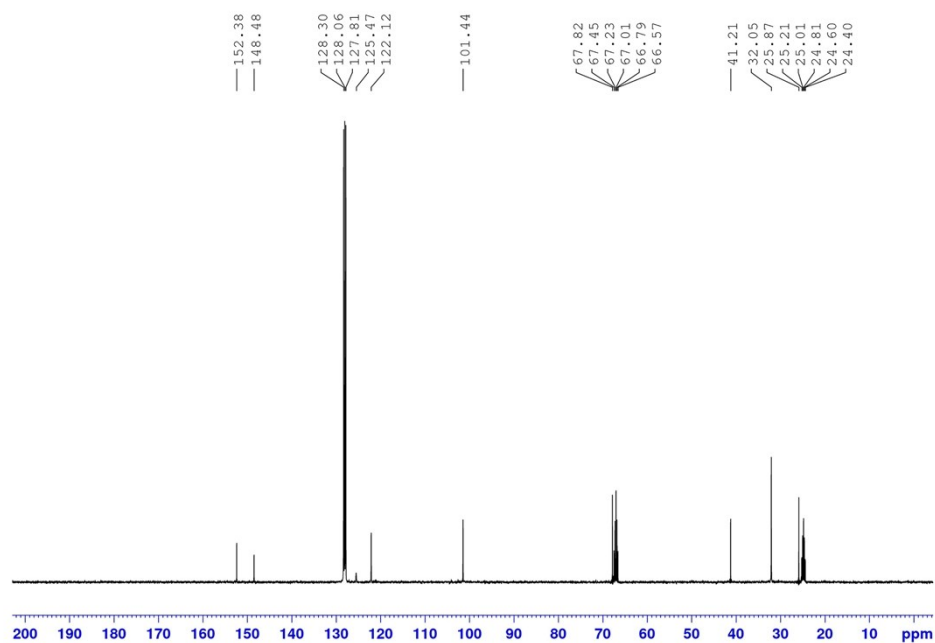

**Figure 13.**  ${}^{13}\text{C}\{{}^1\text{H}\}$  NMR spectrum of  $[\text{Li}_2(\text{L}^{\text{Ar}})(\text{thf})_4]$ , **2** (100.6 MHz,  $\text{C}_6\text{D}_6/[\text{D}_8]\text{thf}$ , 25°C).

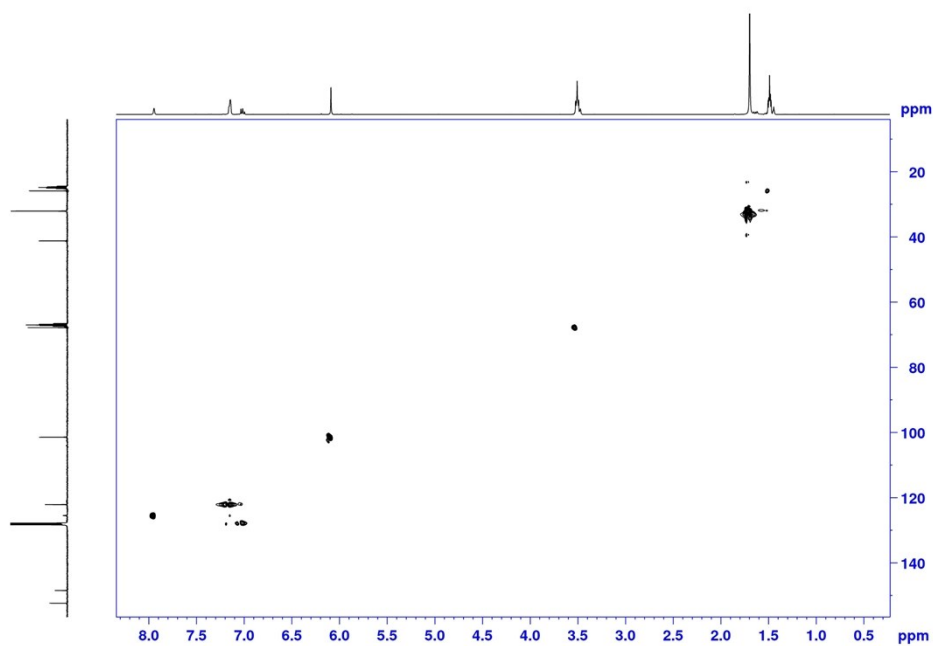

**Figure 14.**  $^1\text{H}$ ,  $^{13}\text{C}$ -HSQC NMR spectrum of  $[\text{Li}_2(\text{L}^{\text{Ar}})(\text{thf})_4]$ , **2** (400.13 MHz,  $\text{C}_6\text{D}_6/[\text{D}_8]\text{thf}$ ,  $25^\circ\text{C}$ ).

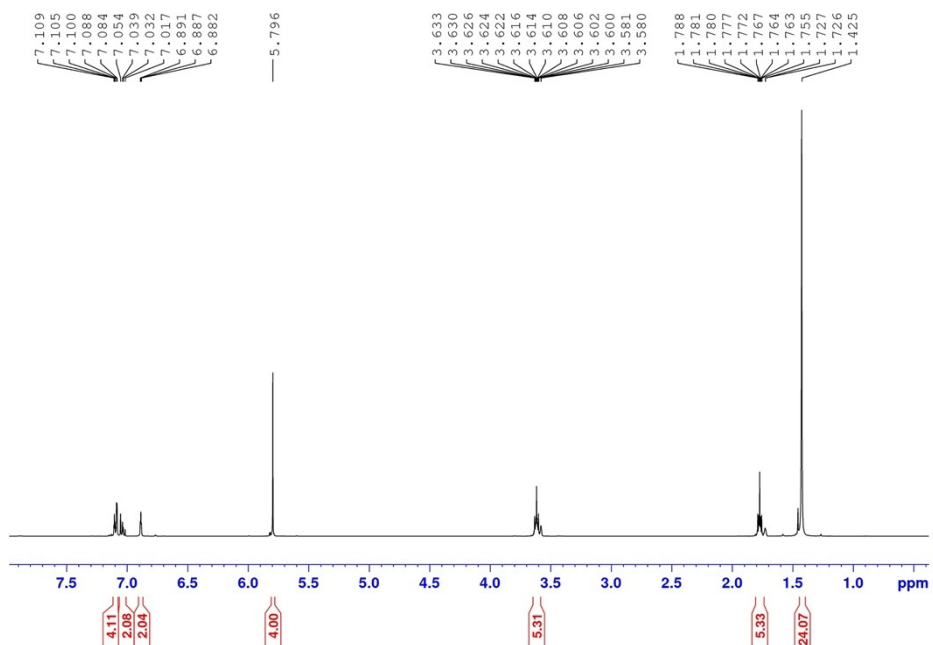

**Figure 15.**  $^1\text{H}$  NMR spectrum of  $[\text{Na}_2(\text{L}^{\text{Ar}})(\text{thf})_3]$ , **3** (400.13 MHz,  $[\text{D}_8]\text{thf}$ ,  $25^\circ\text{C}$ ).

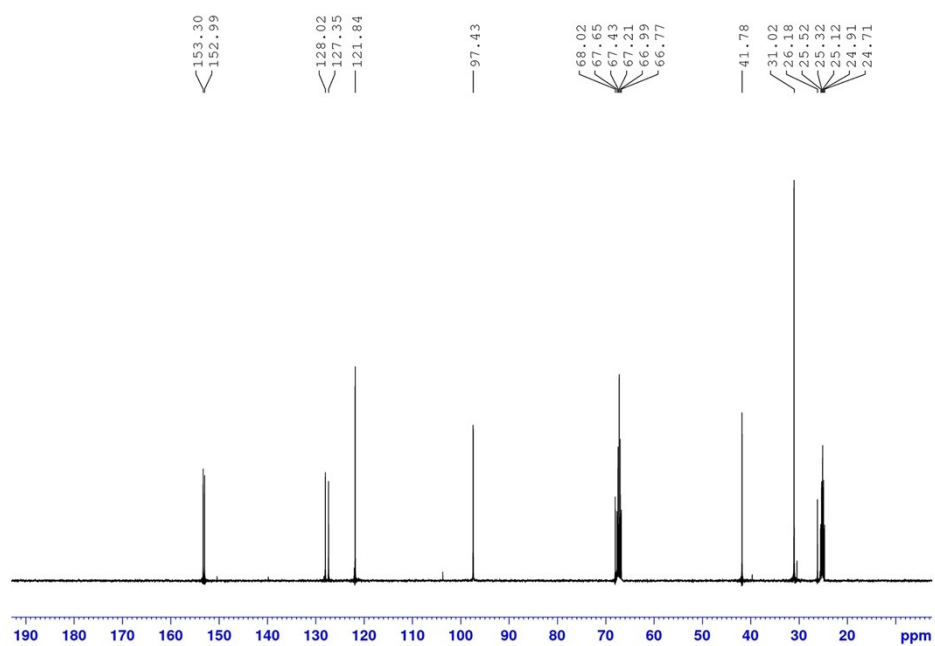

**Figure 16.**  $^{13}\text{C}\{^1\text{H}\}$  NMR spectrum of  $[\text{Na}_2(\text{L}^{\text{Ar}})(\text{thf})_3]$ , **3** (100.6 MHz,  $[\text{D}_8]\text{thf}$ , 25°C).

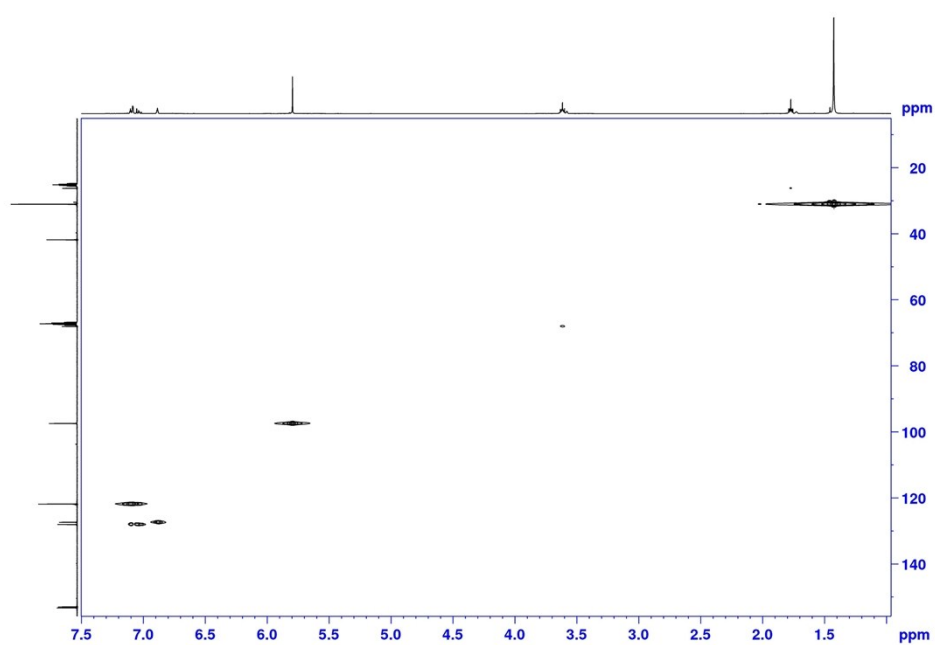

**Figure 17.**  $^1\text{H}$ ,  $^{13}\text{C}$ -HSQC NMR spectrum of  $[\text{Na}_2(\text{L}^{\text{Ar}})(\text{thf})_3]$ , **3** (400.13 MHz,  $[\text{D}_8]\text{thf}$ , 25°C).

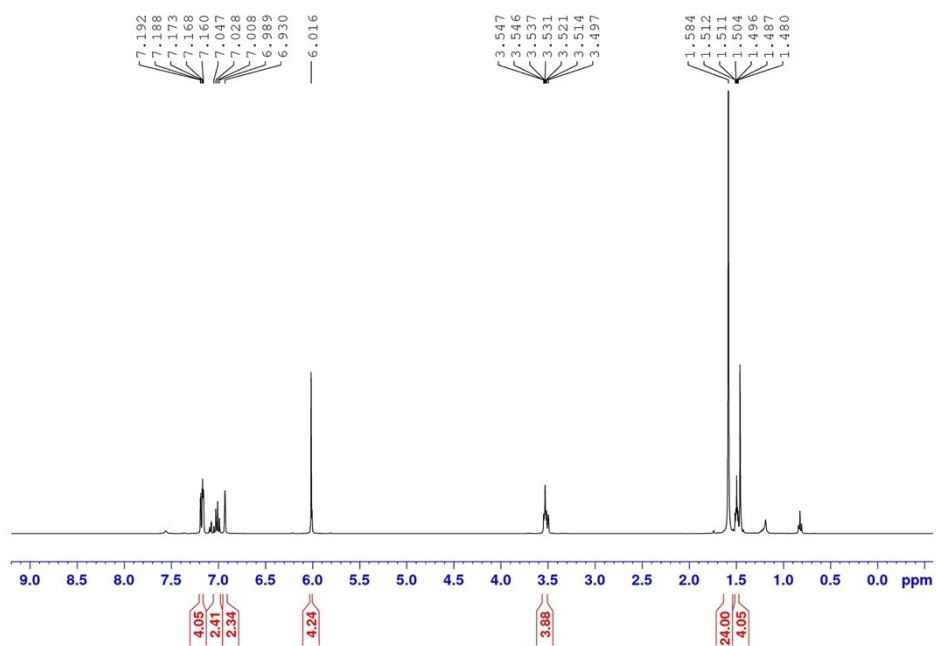

**Figure 18.**  $^1\text{H}$  NMR spectrum of  $[\text{Na}_2(\text{L}^{\text{Ar}})(\text{thf})_3]_\infty$ , **4** (400.13 MHz,  $\text{C}_6\text{D}_6/[\text{D}_8]\text{thf}$ ,  $25^\circ\text{C}$ ).

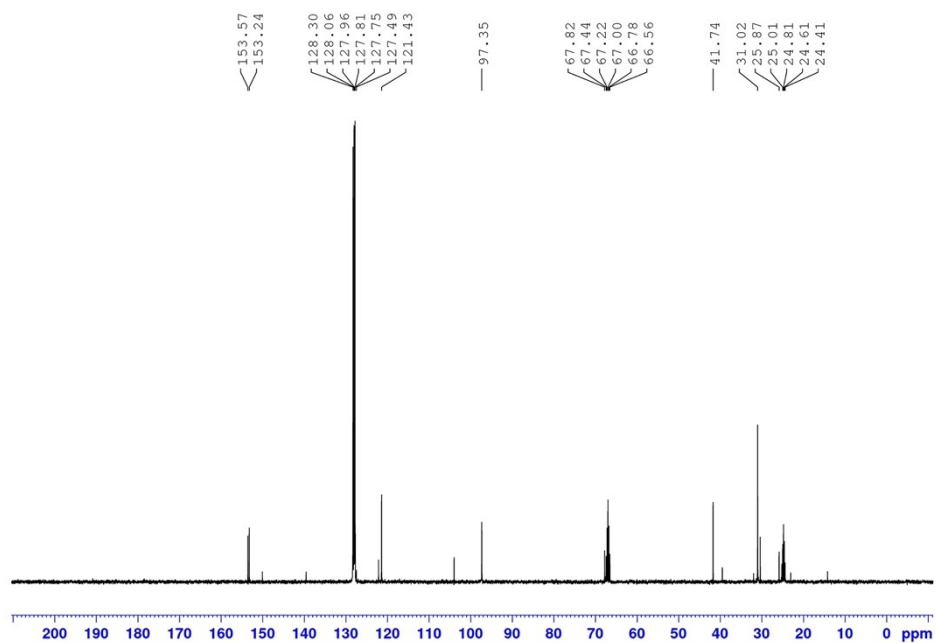

**Figure 19.**  $^{13}\text{C}\{^1\text{H}\}$  NMR spectrum of  $[\text{Na}_2(\text{L}^{\text{Ar}})(\text{thf})_3]_\infty$ , **4** (100.6 MHz,  $\text{C}_6\text{D}_6/[\text{D}_8]\text{thf}$ ,  $25^\circ\text{C}$ ).

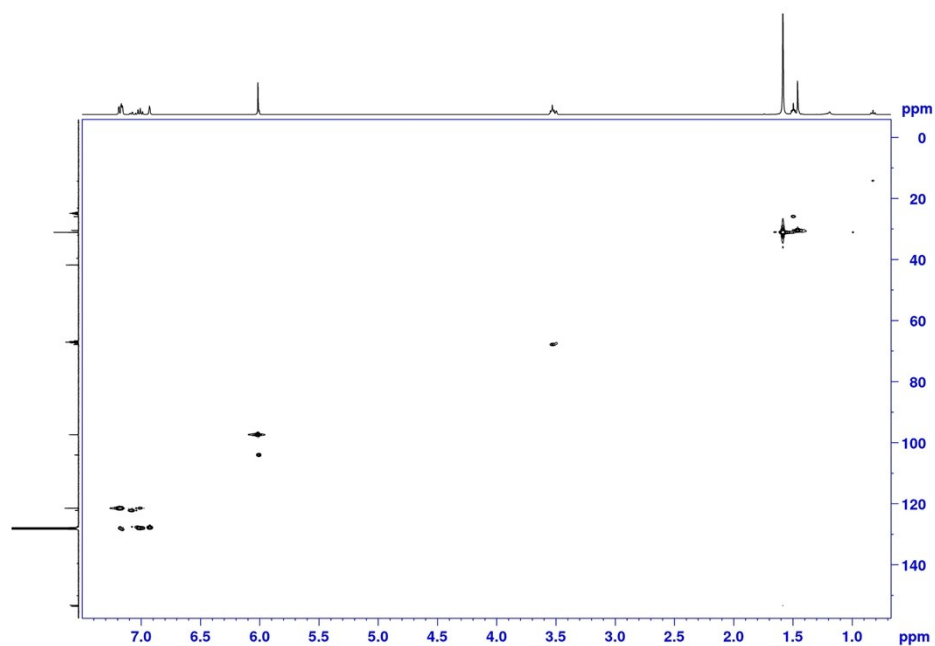

**Figure 20.**  $^1\text{H}$ ,  $^{13}\text{C}$ -HSQC NMR spectrum of  $[\text{Na}_2(\text{L}^{\text{Ar}})(\text{thf})_3]_{\infty}$ , **4** (400.13 MHz,  $\text{C}_6\text{D}_6/[\text{D}_8]\text{thf}$ ,  $25^\circ\text{C}$ ).

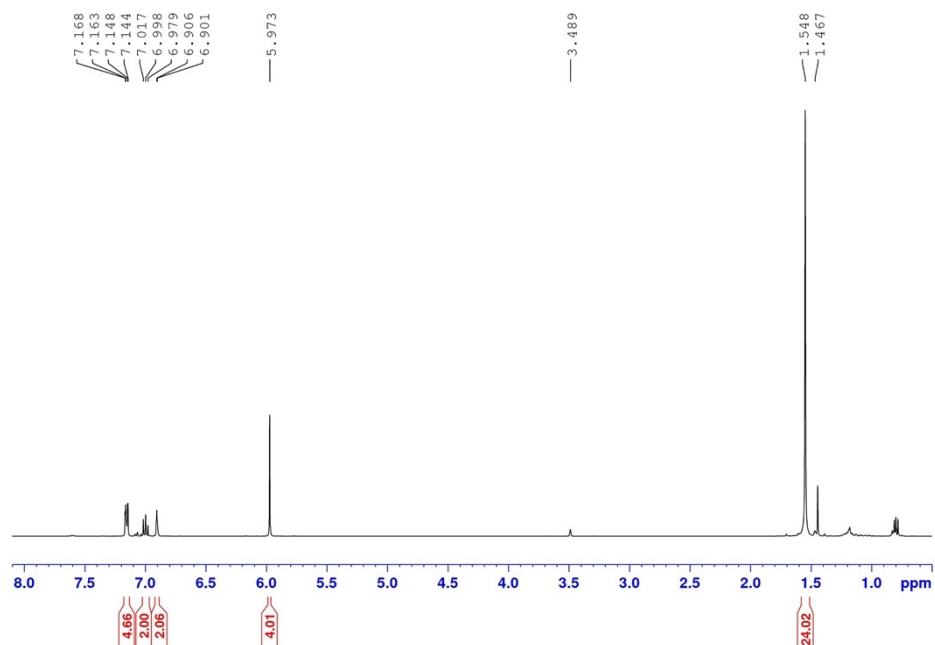

**Figure 21.**  $^1\text{H}$  NMR spectrum of  $[\text{Na}_2(\text{L}^{\text{Ar}})]_4$ , **5** (400.13 MHz,  $\text{C}_6\text{D}_6/[\text{D}_8]\text{thf}$ ,  $25^\circ\text{C}$ ).

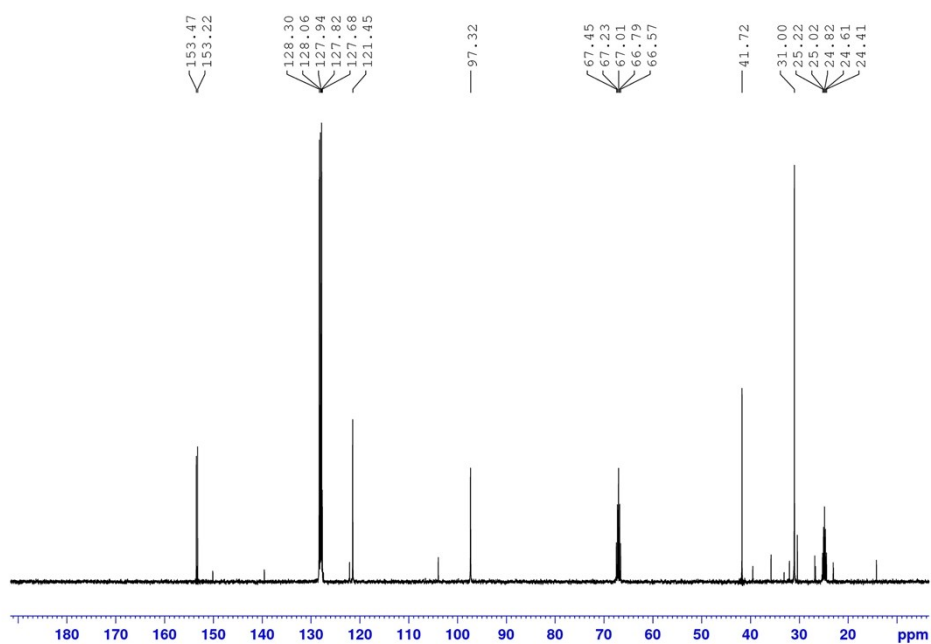

**Figure 22.**  $^{13}\text{C}\{^1\text{H}\}$  NMR spectrum of  $[\text{Na}_2(\text{L}^{\text{Ar}})]_4$ , **5** (100.6 MHz,  $\text{C}_6\text{D}_6/[\text{D}_8]\text{thf}$ , 25°C).

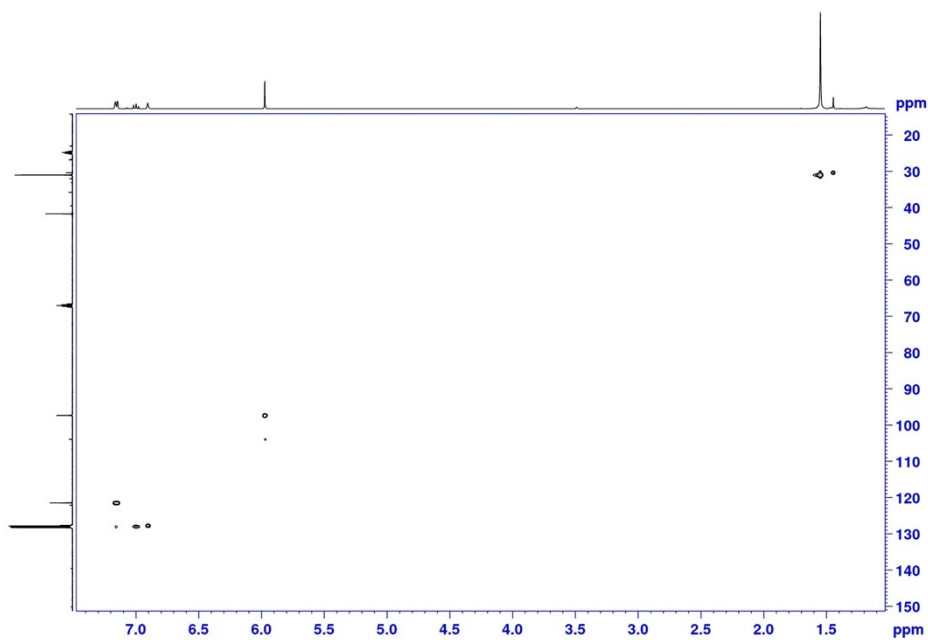

**Figure 23.**  $^1\text{H}$ ,  $^{13}\text{C}$ -HSQC NMR spectrum of  $[\text{Na}_2(\text{L}^{\text{Ar}})]_4$ , **5** (400.13 MHz,  $\text{C}_6\text{D}_6/[\text{D}_8]\text{thf}$ , 25°C).



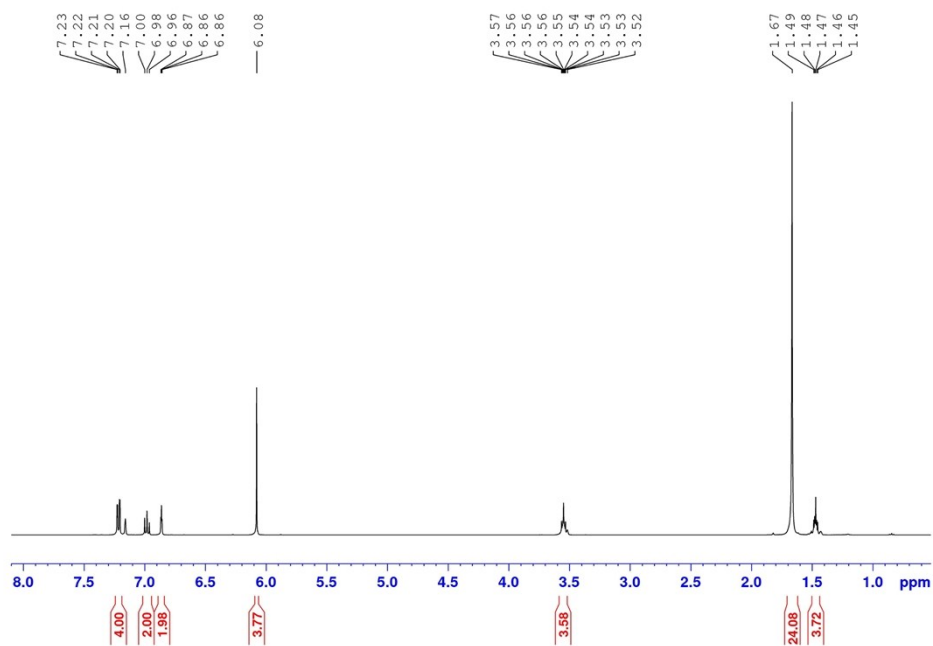

**Figure 24.**  $^1\text{H}$  NMR spectrum of  $[\text{K}_2(\text{L}^{\text{Ar}})(\text{thf})]_{\infty}$ , **6** (400.13 MHz,  $\text{C}_6\text{D}_6/[\text{D}_8]\text{thf}$ ,  $25^\circ\text{C}$ ).

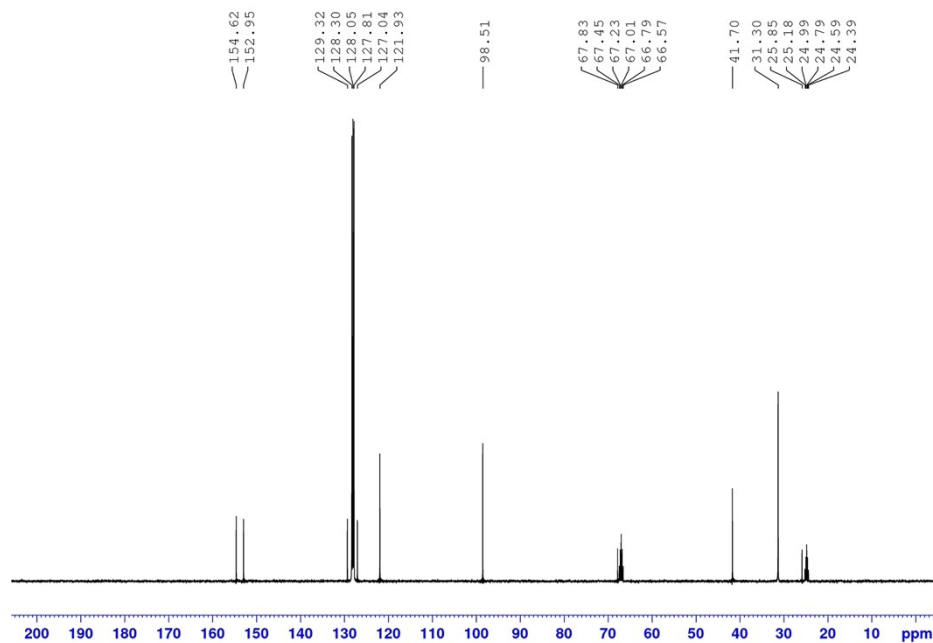

**Figure 25.**  $^{13}\text{C}\{^1\text{H}\}$  NMR spectrum of  $[\text{K}_2(\text{L}^{\text{Ar}})(\text{thf})]_{\infty}$ , **6** (100.6 MHz,  $\text{C}_6\text{D}_6/[\text{D}_8]\text{thf}$ ,  $25^\circ\text{C}$ ).

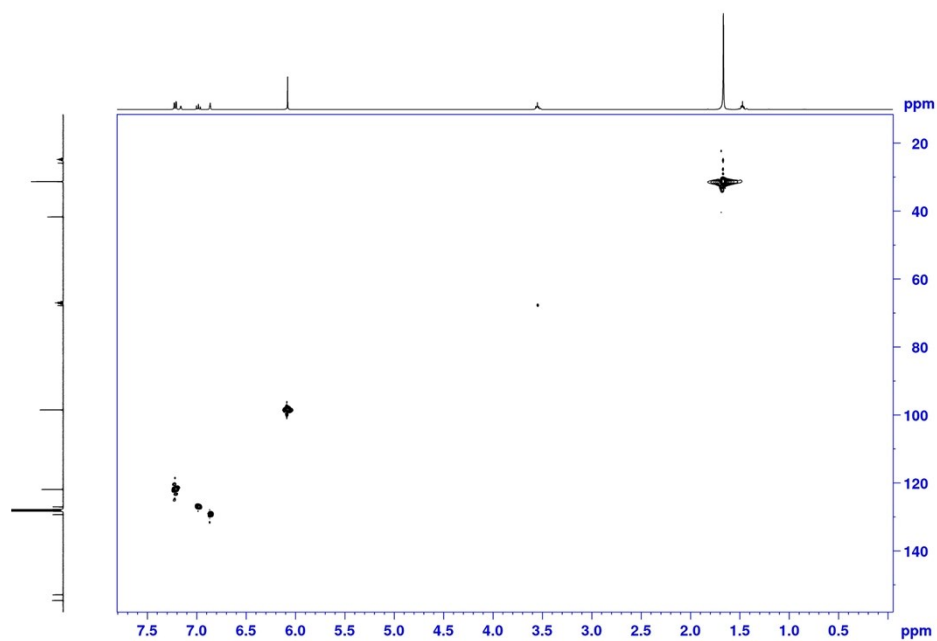

**Figure 26.**  $^1\text{H}$ ,  $^{13}\text{C}$ -HSQC NMR spectrum of  $[\text{K}_2(\text{L}^{\text{Ar}})(\text{thf})]_{\infty}$ , **6** (400.13 MHz,  $\text{C}_6\text{D}_6/[\text{D}_8]\text{thf}$ , 25°C).

## REFERENCES

- [1] J. L. Sessler, W.-S. Cho, V. Lynch, V. Král, *Chem. Eur. J.* **2002**, *8*, 1134-1143.
- [2] G. M. Sheldrick, *Acta Cryst. A* **2008**, *64*, 112-122.
- [3] A. L. Spek, *Acta Cryst. D* **2009**, *65*, 148-155.
